# Supplementary material for: Genome-Wide Association Mapping of Seedling Vigor and Regrowth Vigor in Winter Wheat
Source: MDPI journal article supplement (doi:10.3390/crops1030015), 2021-11-30
Supplement: s1 [file s1]

**Table S1.** BLAST hits of the significant SNPs detected in this study.

| Trait          |                      | QTL Name              | SNP      | Chr | Pos (cM) | Candidate gene and function                                                                                     | Sequence similarity (%) |
|----------------|----------------------|-----------------------|----------|-----|----------|-----------------------------------------------------------------------------------------------------------------|-------------------------|
| Seedling vigor | Shoot length (cm)    | <i>QSLeV.nri-1A</i>   | IWB43660 | 1A  | 29       | E3 ubiquitin-protein ligase HERC2-like (LOC109747999), mRNA, plant development                                  | 96.1                    |
|                |                      | <i>QSLeV.nri-2B</i>   | IWB36210 | 2B  | 163      | Probable magnesium transporter NIPA4 (LOC109745924), mRNA                                                       | 96.9                    |
|                |                      | <i>QSLeV.nri-4B.1</i> | IWB31302 | 4B  | 37       | Aminopeptidase M1-B, vegetative and reproductive development                                                    | 97.0                    |
|                |                      |                       | IWB34257 | 4B  | 37       | None                                                                                                            |                         |
|                |                      |                       | IWB34260 | 4B  | 37       | None                                                                                                            |                         |
|                |                      |                       | IWB36235 | 4B  | 37       | Aminopeptidase M1-B (LOC109766709), mRNA                                                                        | 95.2                    |
|                |                      |                       | IWB6060  | 4B  | 37       | Aminopeptidase M1-B, vegetative and reproductive development                                                    | 99.0                    |
|                |                      |                       | IWB6168  | 4B  | 37       | Aminopeptidase M1-B, vegetative and reproductive development                                                    | 95.1                    |
|                |                      |                       | IWB72103 | 4B  | 37       | Aminopeptidase M1-B, vegetative and reproductive development                                                    | 95.8                    |
|                |                      | <i>QSLeV.nri-4B.2</i> | IWB56078 | 4B  | 55       | Microsomal glutathione S-transferase 3-like (LOC109759267), mRNA                                                | 92.2                    |
|                |                      |                       | IWB7508  | 4B  | 55       | DEAD-box ATP-dependent RNA helicase 21 (LOC109780750), transcript variant X1, mRNA                              | 95.9                    |
|                |                      |                       | IWB35611 | 4B  | 57       | Serine/threonine-protein kinase STE20-like (LOC109773213), mRNA                                                 | 96.5                    |
|                |                      |                       | IWB8217  | 4B  | 60       | 4-hydroxy-3-methylbut-2-enyl diphosphate reductase, chloroplastic (LOC109742400), mRNA, chloroplast development | 94.1                    |
|                |                      | <i>QSLeV.nri-5A</i>   | IWB43526 | 5A  | 86       | None                                                                                                            |                         |
|                |                      | <i>QSLeV.nri-7A</i>   | IWB9062  | 7A  | 136      | None                                                                                                            |                         |
|                | Number of shoots     | <i>QSNeV.nri-2A</i>   | IWB28627 | 2A  | 143      | G-type lectin S-receptor-like serine/threonine-protein kinase B120 (LOC109753569), transcript variant X4, mRNA  | 95.0                    |
|                |                      | <i>QSNeV.nri-5A</i>   | IWA2445  | 5A  | 53       | F-box protein CPR30-like (LOC109755015), mRNA                                                                   | 98.0                    |
|                |                      | <i>QSNeV.nri-7A</i>   | IWB74123 | 7A  | 43       | None                                                                                                            |                         |
|                |                      |                       | IWB8896  | 7A  | 44       | None                                                                                                            |                         |
|                | Shoot dry weight (g) | <i>QSDWeV.nri-6A</i>  | IWB50    | 6A  | 141      | None                                                                                                            |                         |
|                |                      | <i>QSDWeV.nri-7A</i>  | IWB42636 | 7A  | 228      | None                                                                                                            |                         |
|                |                      | <i>QSDWeV.nri-7D</i>  | IWB21364 | 7D  | 138      | None                                                                                                            |                         |
| Regrowth vigor | Shoot length (cm)    | <i>QSLrV.nri-2A</i>   | IWB70425 | 2A  | 126      | None                                                                                                            |                         |
|                |                      | <i>QSLrV.nri-2B</i>   | IWB36210 | 2B  | 163      | Probable magnesium transporter NIPA4 (LOC109745924), mRNA                                                       | 96.9                    |
|                |                      | <i>QSLrV.nri-4B</i>   | IWB7508  | 4B  | 55       | DEAD-box ATP-dependent RNA helicase 21 (LOC109780750), transcript variant X1, mRNA                              | 95.9                    |
|                |                      |                       | IWB35611 | 4B  | 57       | Serine/threonine-protein kinase STE20-like (LOC109773213), mRNA                                                 | 96.5                    |
|                |                      |                       | IWB27677 | 4B  | 58       | Protein ZINC INDUCED FACILITATOR-LIKE 1-like (LOC109759010), mRNA                                               | 91.8                    |
|                |                      |                       | IWB12856 | 4B  | 60       | Inositol-tetrakisphosphate 1-kinase 3 (LOC109732807), transcript variant X2, mRNA                               | 94.8                    |
|                |                      |                       | IWB8217  | 4B  | 60       | 4-hydroxy-3-methylbut-2-enyl diphosphate reductase, chloroplastic (LOC109742400), mRNA                          | 94.1                    |
|                |                      |                       | IWB22991 | 4B  | 63       | Calcium-transporting ATPase 2, plasma membrane-type-like (LOC109746181), transcript variant X3, mRNA            | 95.1                    |
|                |                      |                       | IWA8564  | 4B  | 64       | Clathrin heavy chain 1 (LOC109737496), transcript variant X2, mRNA                                              | 95.2                    |

|                      |                       |          |    |     |                                                                                                                |      |
|----------------------|-----------------------|----------|----|-----|----------------------------------------------------------------------------------------------------------------|------|
|                      |                       | IWB62686 | 4B | 64  | Clathrin heavy chain 1 (LOC109737496), transcript variant X2, mRNA                                             | 95.2 |
|                      |                       | IWB60367 | 4B | 64  | ABC transporter E family member 2 (LOC109771174), mRNA                                                         | 96.1 |
|                      |                       | IWB34983 | 4B | 64  | Protein WVD2-like 4 (LOC109769339), mRNA                                                                       | 99.0 |
|                      |                       | IWB44415 | 4B | 64  | Protein WVD2-like 4 (LOC109769339), mRNA                                                                       | 99.0 |
|                      |                       | IWB53540 | 4B | 64  | putative GTP diphosphokinase RSH1, chloroplastic (LOC109740650), mRNA                                          | 97.0 |
|                      |                       | IWB43701 | 4B | 64  | Protein WVD2-like 4 (LOC109769339), mRNA                                                                       | 99.0 |
|                      |                       | IWB52927 | 4B | 64  | None                                                                                                           |      |
|                      | <i>QSLrV.nri-5A</i>   | IWB38719 | 5A | 89  | None                                                                                                           |      |
|                      | <i>QSLrV.nri-6B.1</i> | IWB9950  | 6B | 66  | None                                                                                                           |      |
|                      |                       | IWB2837  | 6B | 67  | None                                                                                                           |      |
|                      | <i>QSLrV.nri-6B.2</i> | IWB59306 | 6B | 114 | None                                                                                                           |      |
|                      | <i>QSLrV.nri-7B</i>   | IWB8019  | 7B | 54  | None                                                                                                           |      |
|                      |                       | IWB66896 | 7B | 58  | None                                                                                                           |      |
| Number of shoots     | <i>QSNrV.nri-4B</i>   | IWB27735 | 4B | 105 | F-box protein CPR30-like (LOC109755015), mRNA                                                                  | 98.0 |
|                      | <i>QSNrV.nri-6A</i>   | IWB71326 | 6A | 141 | G-type lectin S-receptor-like serine/threonine-protein kinase B120 (LOC109753569), transcript variant X4, mRNA | 95.2 |
|                      |                       | IWB27178 | 6A | 141 | None                                                                                                           |      |
|                      | <i>QSNrV.nri-7B</i>   | IWA4802  | 7B | 134 | NF-X1-type zinc finger protein NFXL1-like (LOC109735365), transcript variant X2, mRNA                          | 99.0 |
|                      |                       | IWB2166  | 7B | 134 | None                                                                                                           |      |
| Shoot dry weight (g) | <i>QSDWrV.nri-1B</i>  | IWB66973 | 1B | 118 | Uncharacterized LOC109782568 (LOC109782568), mRNA                                                              | 89.6 |
|                      |                       | IWB72142 | 1B | 118 | Uncharacterized LOC109782570 (LOC109782570), mRNA                                                              | 96.1 |
|                      |                       | IWB12093 | 1B | 118 | Uncharacterized LOC109766637 (LOC109766637), mRNA                                                              | 93.1 |
|                      |                       | IWB12399 | 1B | 118 | Uncharacterized LOC109782568 (LOC109782568), mRNA                                                              | 95.1 |
|                      |                       | IWB1725  | 1B | 118 | Uncharacterized LOC109782568 (LOC109782568), mRNA                                                              | 95.9 |
|                      |                       | IWB29151 | 1B | 118 | Uncharacterized LOC109782568 (LOC109782568), mRNA                                                              | 95.1 |
|                      |                       | IWB63739 | 1B | 118 | Uncharacterized LOC109766637 (LOC109766637), mRNA                                                              | 97.1 |
|                      |                       | IWB29150 | 1B | 118 | mRNA for predicted protein, complete cds, clone: NIASHV1015A07                                                 | 91.7 |
|                      |                       | IWB36563 | 1B | 118 | Uncharacterized LOC109782568 (LOC109782568), mRNA                                                              | 97.1 |
|                      | <i>QSDWrV.nri-2B</i>  | IWB4865  | 2B | 134 | Ubiquinol oxidase 4, chloroplastic/chromoplastic (LOC109747192), mRNA                                          | 95.1 |
|                      | <i>QSDWrV.nri-4A</i>  | IWA5968  | 4A | 109 | Dormancy-associated protein homolog 3-like (LOC109777200), transcript variant X1, mRNA                         | 81.9 |
|                      | <i>QSDWrV.nri-4B</i>  | IWB24289 | 4B | 78  | None                                                                                                           |      |
|                      | <i>QSDWrV.nri-6A</i>  | IWB12052 | 6A | 26  | None                                                                                                           |      |
|                      | <i>QSDWrV.nri-7A</i>  | IWB42636 | 7A | 228 | None                                                                                                           |      |
